# Supplementary material for: An immobilization multienzyme microfluidic chip for acetylcholinesterase inhibition assay by fluorescence method
Source: Royal Society of Chemistry journal article supplement (doi:10.1039/c5ra22788g), 2016-01-01
Supplement: c5ra22788g1.pdf [file c5ra22788g1.pdf]

Supplementary Material

**An immobilization multienzyme microfluidic chip for  
acetylcholinesterase inhibition assay by fluorescence method**

Yulan Tang<sup>1</sup>, Sufang Liu<sup>2\*</sup>, Rongbiao Pi<sup>1</sup>, Zhiyi Cheng<sup>1†</sup>

*1. School of Pharmaceutical Sciences, Sun Yat-Sen University, Guangzhou  
510006, China*

*2. School of Public Health, Sun Yat-Sen University, Guangzhou 510080, China*

---

\* Corresponding author. *E-mail:* liusf@mail.sysu.edu.cn. *Tel:* +86 020 87332517.

† Corresponding author. *E-mail:* chengzhy@mail.sysu.edu.cn. *Tel:* +86 020 39943047.

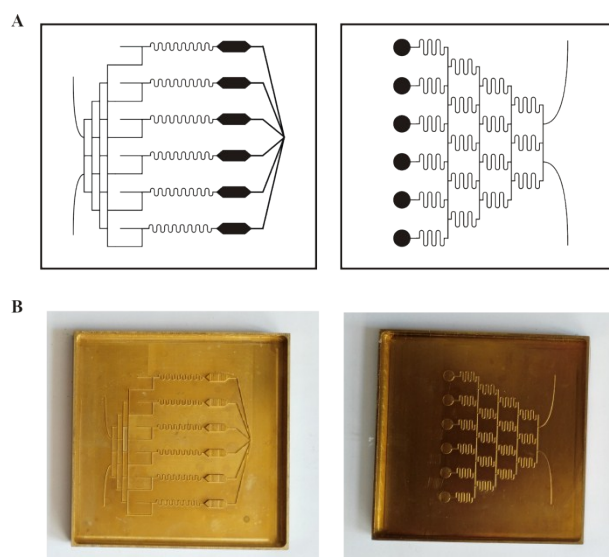

**Fig. S1** The layout of microchannels network (A) and photograph of copper molds (B)

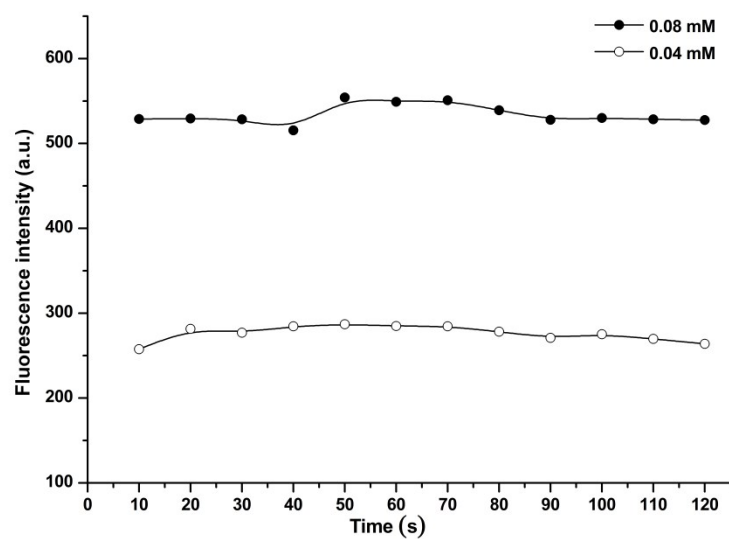

**Fig. S2** The kinetic curves of HRP catalysed reaction system, using  $\text{H}_2\text{O}_2$  solutions with concentrations of 0.04 mM ( $\circ$ ) and 0.08 mM ( $\bullet$ ).
